# Supplementary material for: CircNTNG1 inhibits renal cell carcinoma progression via HOXA5-mediated epigenetic silencing of Slug
Source: PubMed Central journal article supplement (PMC9761964; doi:10.1186/s12943-022-01694-7), 2022-12-19

**A**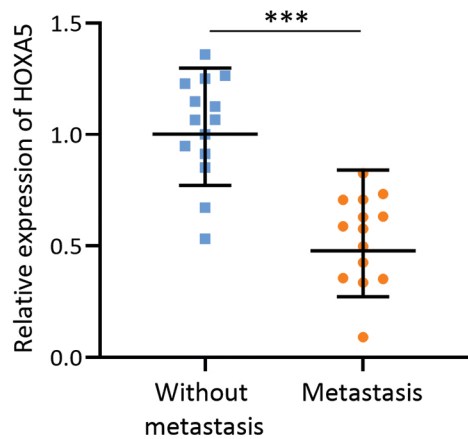**B**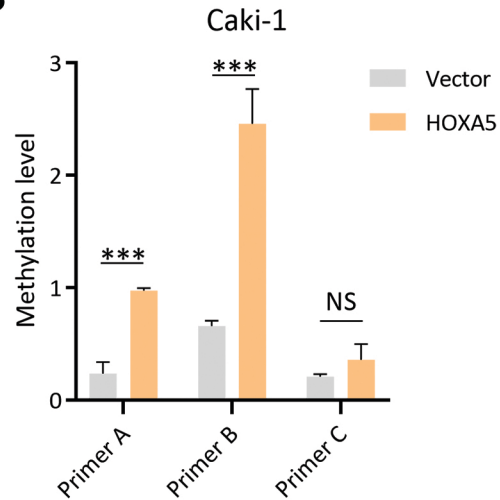**C**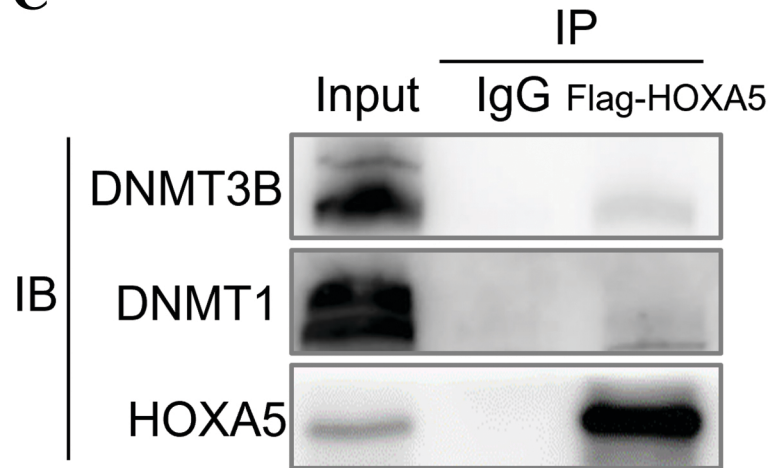

Supplement: 12943_2022_1694_MOESM4_ESM.pdf [file 12943_2022_1694_MOESM4_ESM.pdf]
